# Supplementary material
Source: PubMed Central journal article supplement (PMC7580572)
Supplement: Supp_Fig1.pdf [file Supp_Fig1.pdf]

## Supplementary Data

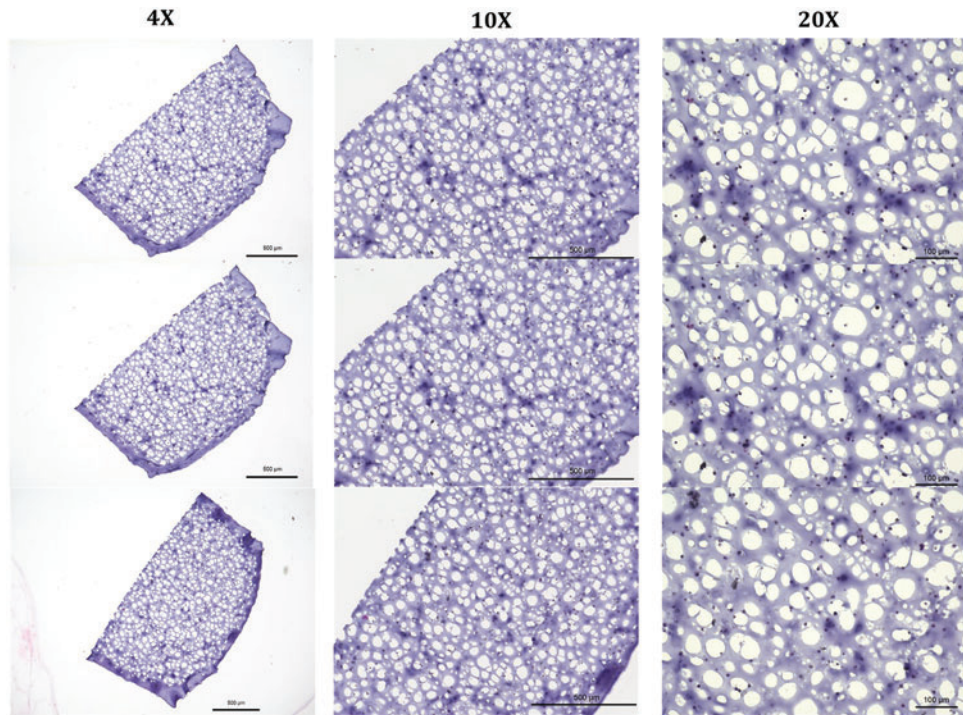

**SUPPLEMENTARY FIG. S1.** H&E staining sections of scaffolds with macrophages. Coronal sections of scaffold with 800,000 macrophages stained with H&E showing an even distribution of macrophages throughout different depths of the scaffold. H&E, Hematoxylin and Eosin.
