# Supplementary material
Source: PubMed Central journal article supplement (PMC7580572)
Supplement: Supp_Fig2.pdf [file Supp_Fig2.pdf]

## M1-associated markers ELISA-Supplement

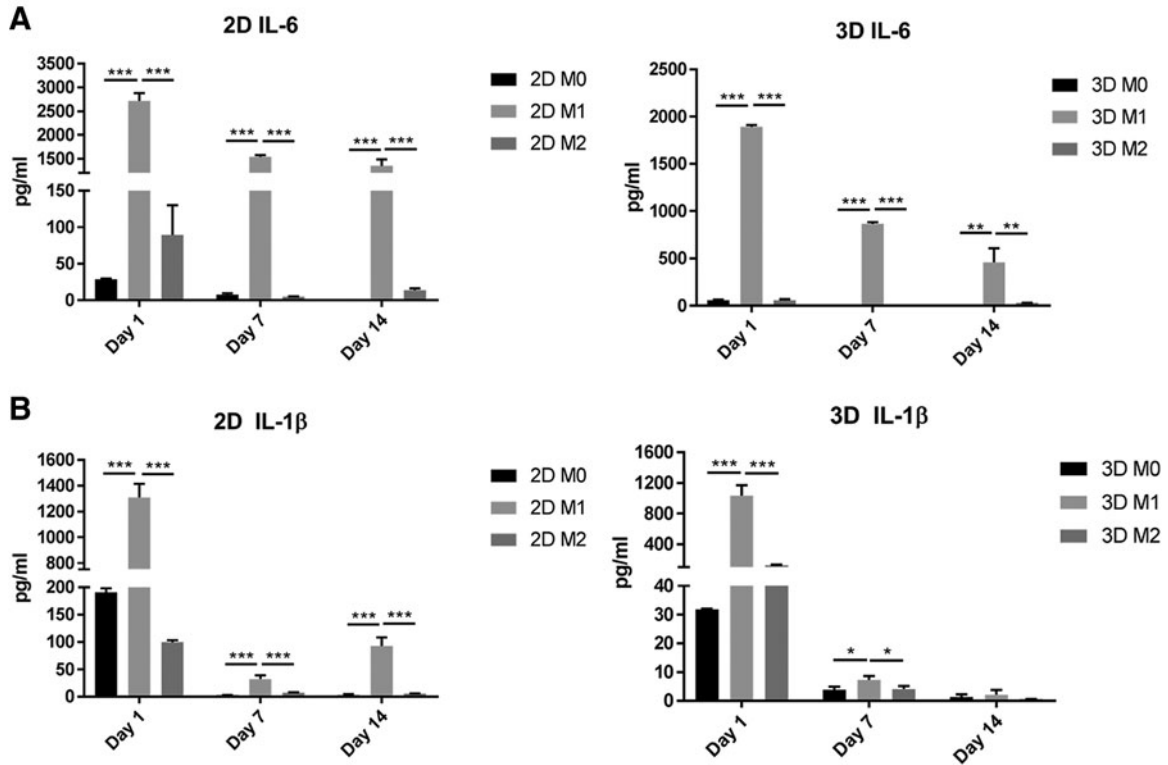

**SUPPLEMENTARY FIG. S2.** Macrophage polarization in 2D and 3D cultures to M1 phenotype. (A) Secretion of IL-6 and (B) IL-1 $\beta$  in (*left*) 2D and (*right*) 3D by M0, M1, and M2 macrophages after polarizations on days 1, 7, and 14 determined by ELISA. Each value represents the mean  $\pm$  SD. \* $p < 0.05$ , \*\* $p < 0.01$ , and \*\*\* $p < 0.001$  compared with either 2D M0 or 3D M0 cultures. 2D, two-dimensional; 3D, three-dimensional; IL, interleukin; ELISA, enzyme-linked immunosorbent assay; SD, standard deviation.
